# Supplementary material for: Developmental and organ-specific toxicity of cucurbit[7]uril: in vivo study on zebrafish models
Source: Royal Society of Chemistry journal article supplement (doi:10.1039/c5ra04335b), 2015-01-01

## Developmental and organ-specific toxicity of cucurbit[7]uril: *in vivo* study on zebrafish models

Huanxian Chen,<sup>1,†</sup> Judy Y.W. Chan,<sup>1,†</sup> Xue Yang,<sup>1</sup> Ian W. Wyman,<sup>2</sup> David Bardelang,<sup>3</sup>  
Donal H. Macartney,<sup>2</sup> Simon M. Y. Lee,<sup>1,\*</sup> and Ruibing Wang<sup>1,\*</sup>

<sup>1</sup> State Key Laboratory of Quality Research in Chinese Medicine, and Institute of Chinese Medical Sciences, University of Macau, Taipa, Macao, China

<sup>2</sup> Department of Chemistry, Queen's University, Kingston, ON, K7L 3N6, Canada

<sup>3</sup> Université d'Aix Marseille, CNRS, Institut de Chimie Radicalaire, UMR-CNRS 7273, Marseille, France

### **Supplementary figure:**

The figure showing the track of swimming in 10 minutes after the zebrafish were treated with 0  $\mu\text{M}$  (A), 125  $\mu\text{M}$  (B), 250  $\mu\text{M}$  (C), 500  $\mu\text{M}$  (D) and 750  $\mu\text{M}$  (E) of CB[7] for 240 min. There are 8 representative data for each treatment group.

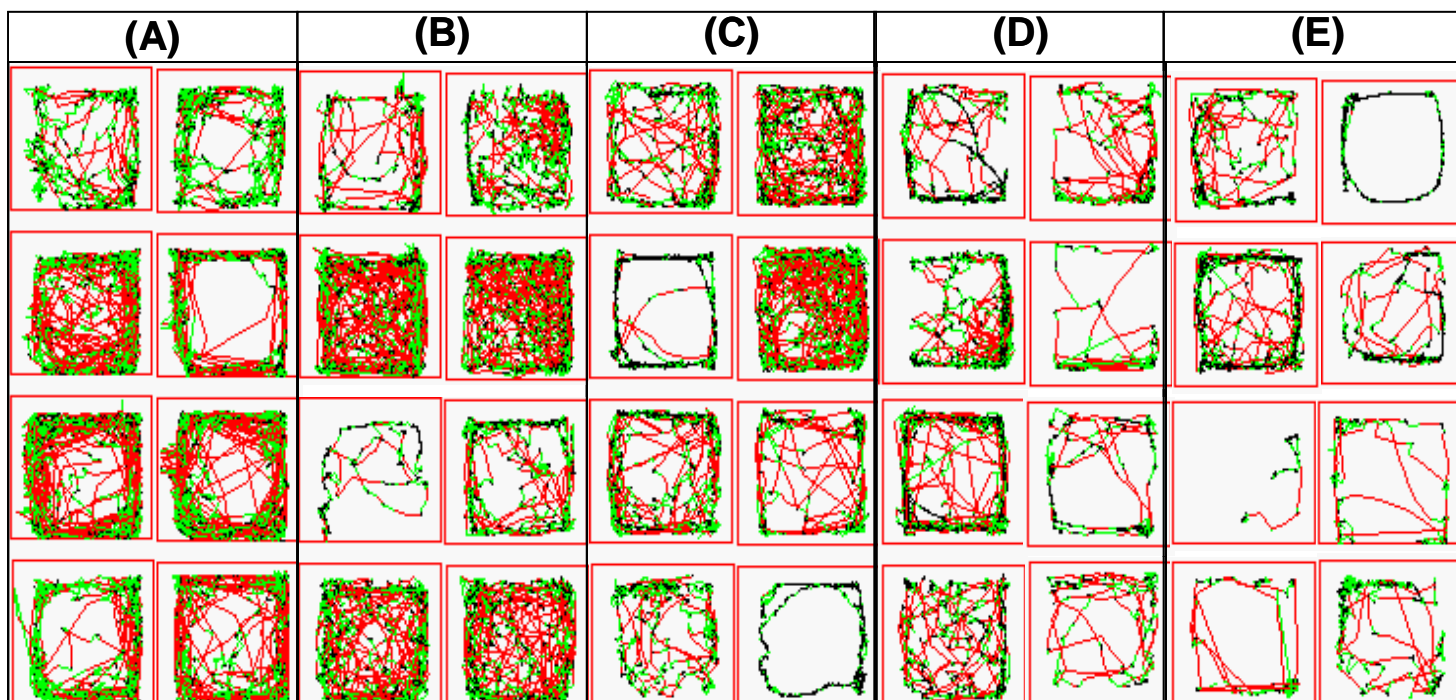

Supplement: c5ra04335b1.pdf [file c5ra04335b1.pdf]
